# Supplementary material
Source: PubMed Central journal article supplement (PMC4001369)
Supplement: supp_tpc.113.120642_tpc120642Supplemental.pdf [file supp_tpc.113.120642_tpc120642Supplemental.pdf]

## Ca<sup>2+</sup>-activated ROS production by *Arabidopsis* RbohH and RbohJ is essential for proper pollen tube tip growth

Hidetaka Kaya, Ryo Nakajima, Megumi Iwano, Masahiro M. Kanaoka, Sachie Kimura, Seiji Takeda, Tomoko Kawarazaki, Eriko Senzaki, Yuki Hamamura, Tetsuya Higashiyama, Seiji Takayama, Mitsutomo Abe, and Kazuyuki Kuchitsu

**A**

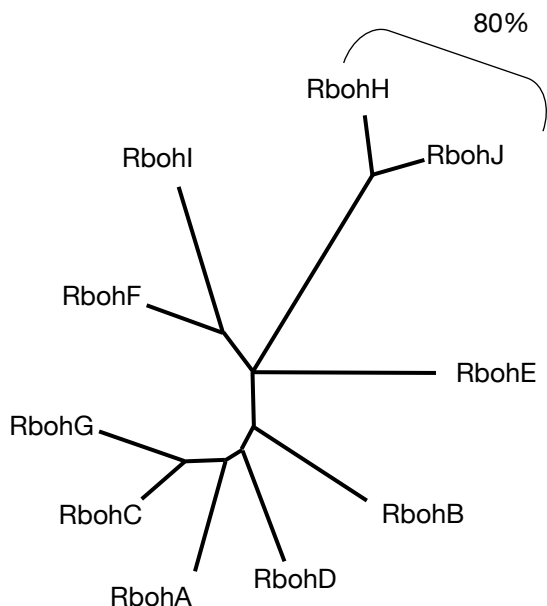

**B**

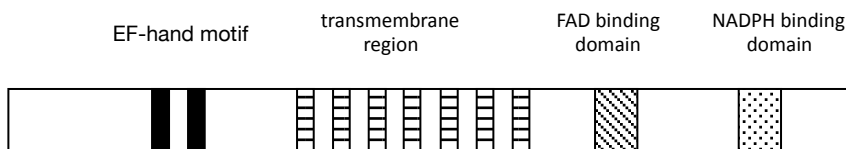

**Supplemental Figure S1.** Phylogenetic tree of *Arabidopsis* Rboh and the domain structure of Rboh (A) Phylogenetic tree of *Arabidopsis* Rboh based on the neighbor-joining algorithm in ClustalX. RbohH and RbohJ had the highest level of amino acid sequence similarity (80%). (B) Schematic representation of the domain structures of Rboh. All Rboh proteins are transmembrane proteins with six transmembrane helices. The N-terminal region of Rboh contains two EF-hand motifs, whereas the C-terminal region has FAD- and NADPH-binding domains. FAD, flavin adenine dinucleotide; NADPH, reduced nicotinamide adenine dinucleotide phosphate.

**A**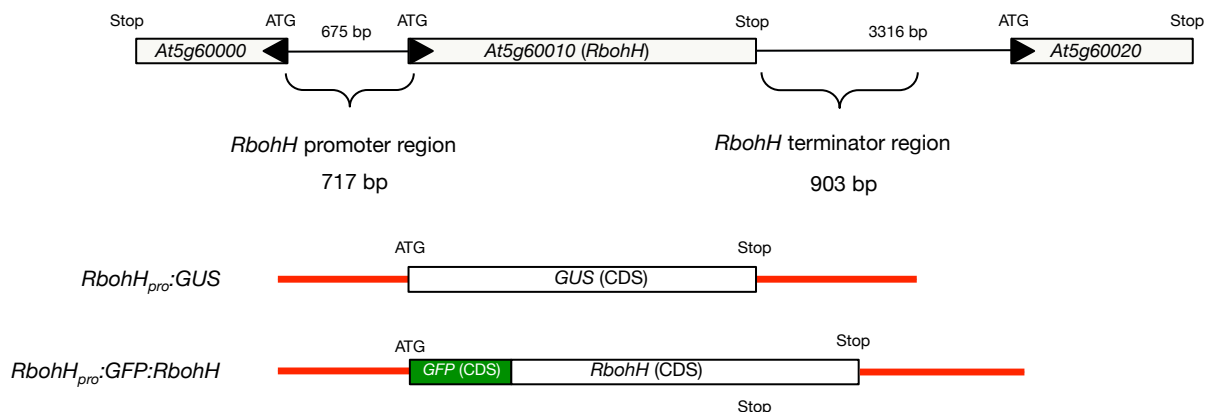**B**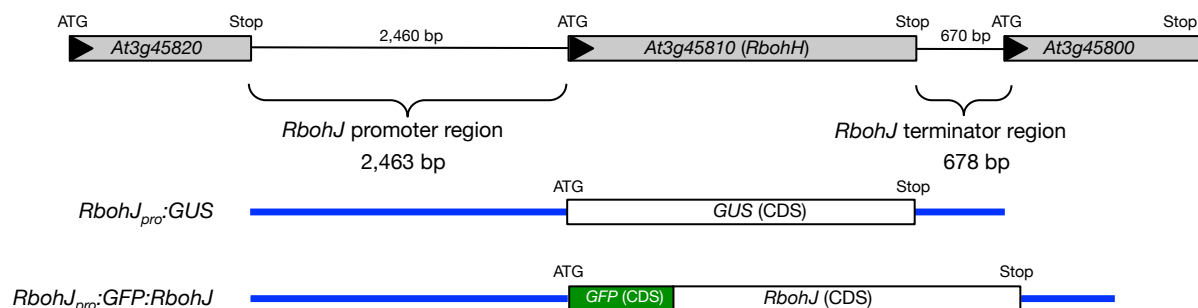**C**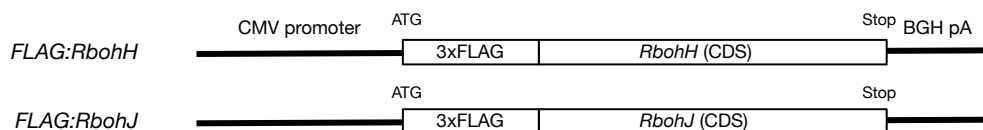

**Supplemental Figure S2**. Plasmid construction. (A) Genetic organization of *RbohH*. There are 675 base pairs between *At5g6000* and *RbohH*, whereas there are 3316 base pairs between *RbohH* and *At5g60020*. The 717 base pairs upstream of the start codon of *RbohH* were used as the promoter, and 903 base pairs downstream of the stop codon of *RbohH* were used as the terminator. Triangles indicate the direction of translation. Plasmid constructs (*RbohH<sub>pro</sub>:GUS*, *RbohH<sub>pro</sub>:GFP:RbohH*) were used to express the chimeric gene under the control of the *RbohH* promoter in *Arabidopsis thaliana*. The coding sequence (CDS) region of *GUS* and *GFP*-fused *RbohH* were cloned between the promoter and terminator (red lines) of *RbohH*.

(B) The genetic organization of the *RbohJ* region. There are 2460 base pairs between *At3g45820* and *RbohJ*, whereas there are 670 base pairs between *RbohJ* and *At3g4580*. The 2463 base pair region upstream of the start codon of *RbohH* was used as the promoter, and the 678 base pair region downstream of the stop codon of *RbohJ* was used as the terminator. The triangles indicate the direction of translation. Plasmid constructs (*RbohJ<sub>pro</sub>:GUS*, *RbohJ<sub>pro</sub>:GFP:RbohJ*) were used to express the chimeric gene under the control of the *RbohJ* promoter in *A. thaliana*. The CDS region of *GUS* and *GFP*-fused *RbohJ* were cloned between the promoter and terminator (blue lines) of *RbohJ*. (C) Plasmid constructs (*FLAG:RbohH*, *FLAG:RbohJ*) for expressing FLAG-tagged RbohH and RbohJ in HEK293T cells. The CDS region of *RbohH*, *RbohJ*, and their EF-hand mutants were cloned with a 3×FLAG sequence into the pcDNA3.1 (–) vector between the cytomegalovirus (CMV) promoter and the bovine growth hormone (BGH) polyadenylation signal (black lines). Each EF-hand mutant was generated by inducing point mutations in the EF-hand motif.

**A**

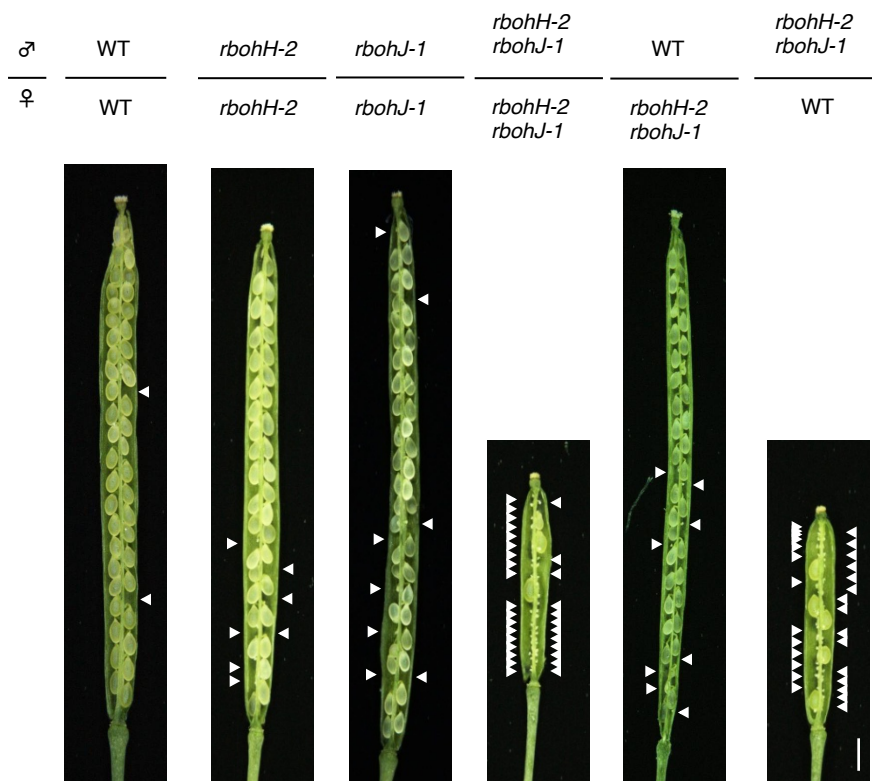

**B**

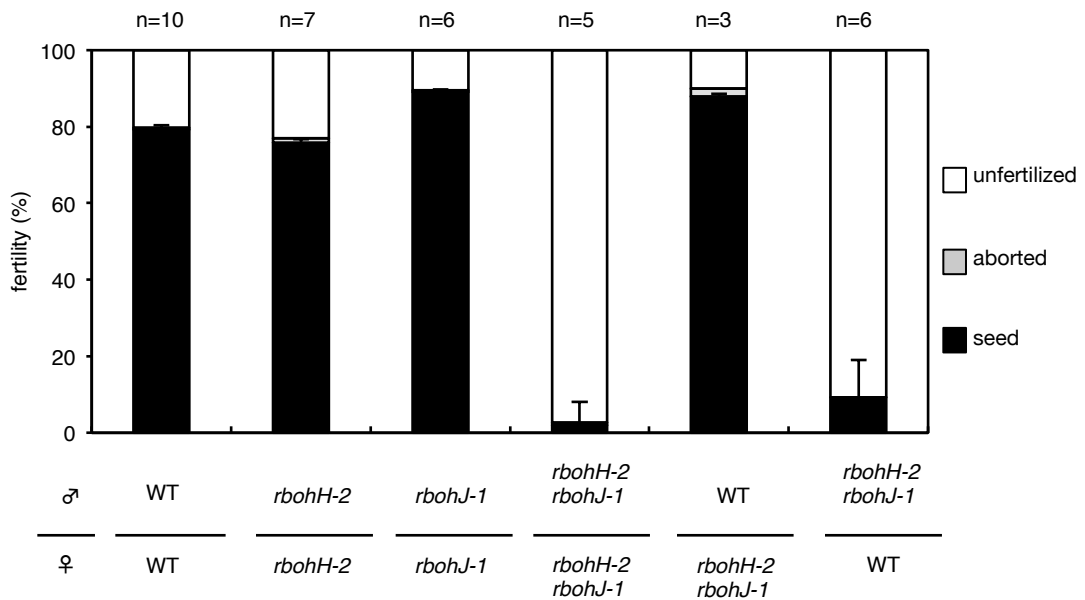

**Supplemental Figure S3.** The *rbohH-2 rbohJ-1* double mutant (Ws background) had reduced fertility. (A) Dissected siliques harvested 5–10 d after hand pollination. White arrowheads indicate unfertilized ovules. Scale bar = 1 mm. (B) Percentage of normal seeds, aborted seeds, and unfertilized ovules in siliques. Siliques were harvested 5–10 d after hand pollination. ♂ indicates the genotype of the pollen grain. ♀ indicates the genotype of the pistil. Closed bars indicate normal seeds; gray bars indicate aborted seeds; open bars indicate unfertilized ovules. Values are means ± S.E. (n = 3–10 siliques).

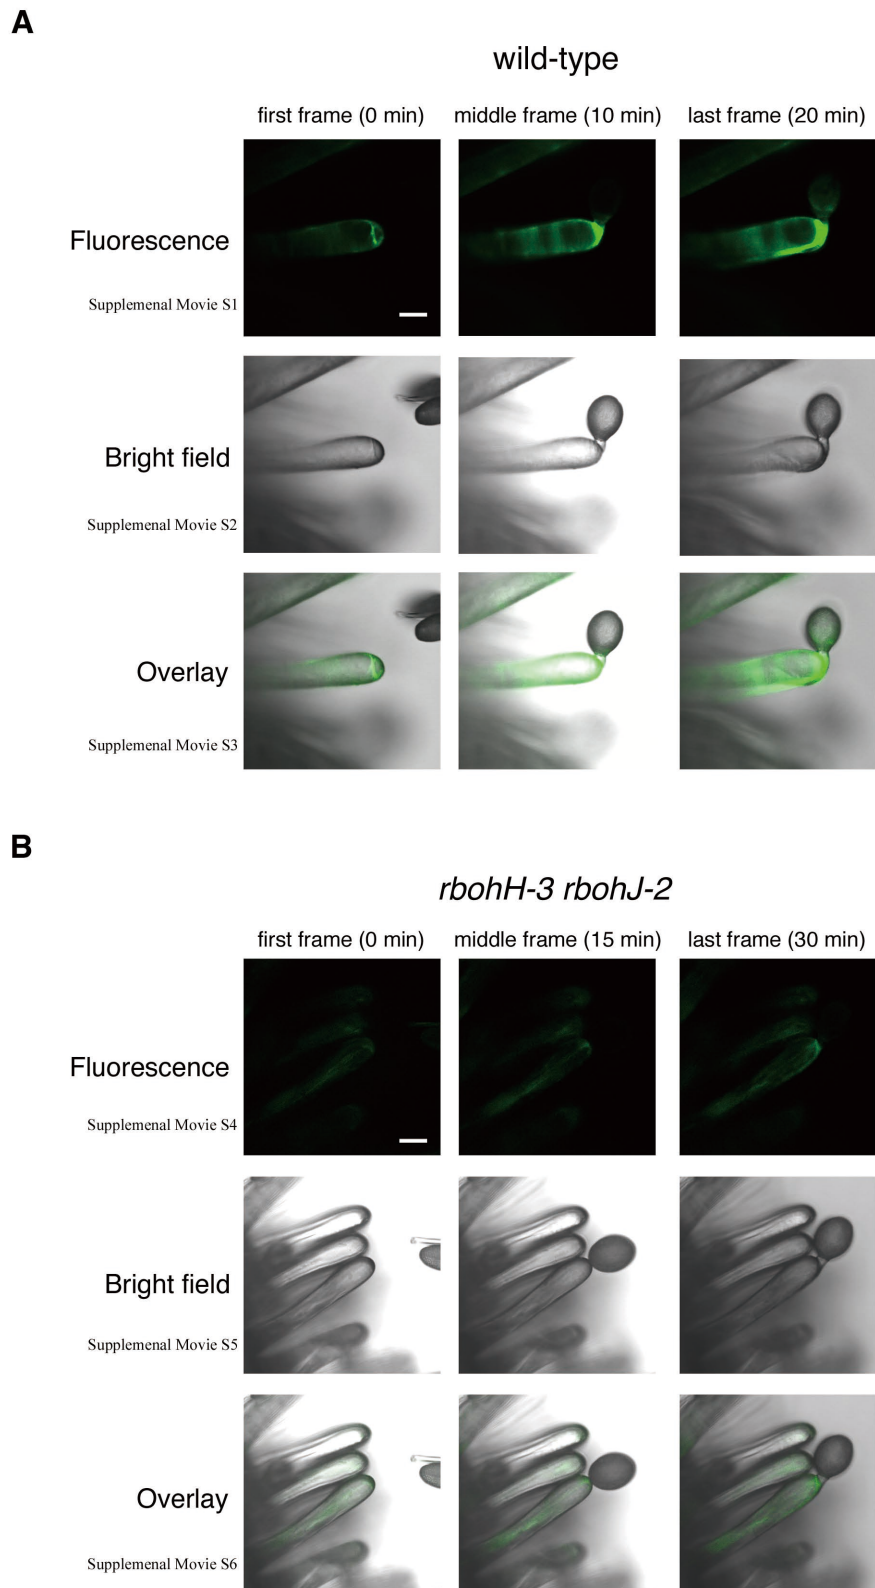

**Supplemental Figure S4.** The still images of Supplemental Movies S1–6. Detection of ROS on the wild-type stigmatic papilla cell after pollination with the wild-type (A; Supplemental Movies S1–3) or the *rbohH-3 rbohJ-2* double mutant (B; Supplemental Movies S4–6) pollen grain. ROS were visualized using the fluorescent ROS indicator Oxyburst Green (H<sub>2</sub>DCFDA). Scale bar = 10  $\mu$ m.

**Supplemental Table 1.** Sequences of Primers Used in This Work.

| primer name   | Primer sequence                                                 | Purpose              |
|---------------|-----------------------------------------------------------------|----------------------|
| RbohH-BamHI-F | 5'- <u>GGATCC</u> AAAAGTAACAC <u>CCC</u> AACGGAGG-3'            | Plasmid construction |
| RbohH-EcoRV-R | 5'- <u>GATATC</u> <u>C</u> TA AAAATT <u>C</u> TCCTTGTGGAAAGT-3' | Plasmid construction |
| RbohJ-BamHI-F | 5'- <u>GGATCC</u><br>AAAAACAACAAAAAGGT <u>G</u> GGGACC-3'       | Plasmid construction |
| RbohJ-BamHI-R | 5'- <u>GGATCC</u> TCAGAA ATTCTCTTTGTGAAA A-3'                   | Plasmid construction |

Underlines indicate restriction enzyme site. Red colors indicate silent mutation sites.
