# Supplementary material
Source: PubMed Central journal article supplement (PMC4001369)
Supplement: supp_tpc.113.120642_tpc120642SupplementalML.pdf [file supp_tpc.113.120642_tpc120642SupplementalML.pdf]

### **Supplemental Movies Legends.**

**Supplemental Movie S1.** Detection of ROS on a wild-type stigmatic papilla cell after pollination with a wild-type pollen grain. Fluorescence images. ROS were visualized using the fluorescent ROS indicator Oxyburst Green (H<sub>2</sub>DCFDA). Consecutive images were captured at 1-min intervals for about 20 min.

**Supplemental Movie S2.** Detection of ROS on a wild-type stigmatic papilla cell after pollination with a wild-type pollen grain. Bright field images. Consecutive images were captured at 1-min intervals for about 20 min.

**Supplemental Movie S3.** Detection of ROS on a wild-type stigmatic papilla cell after pollination with a wild-type pollen grain. Overlay images. Consecutive images were captured at 1-min intervals for about 20 min.

**Supplemental Movie S4.** Detection of ROS on the a-type stigmatic papilla cell after pollination with an *rbohH-3 rbohJ-2* double mutant pollen grain. Fluorescence images. ROS were visualized using the fluorescent ROS indicator Oxyburst Green (H<sub>2</sub>DCFDA). Consecutive images were captured at 1-min intervals for about 30 min.

**Supplemental Movie S5.** Detection of ROS on a wild-type stigmatic papilla cell after pollination with an *rbohH-3 rbohJ-2* double mutant grain. Bright field images. Consecutive images were captured at 1-min intervals for about 30 min.

**Supplemental Movie S6.** Detection of ROS on a wild-type stigmatic papilla cell after pollination with an *rbohH-3 rbohJ-2* double mutant grain. Overlay images. Consecutive images were captured at 1-min intervals for about 30 min.

### **Supplemental Movies Material and Method.**

Flowers of wild-type (Col) *A. thaliana* whose anthers were removed before dehiscence were excised and attached to an agar plate. A drop of 20  $\mu$ M Oxyburst Green (Life Technologies, Carlsbad, CA, USA) solution containing 0.005% Tween 20 was put on the stigma and air-dried for 1 h. The pistil was mounted on a cover slip and a pollen grain from a freshly-dehiscid anther of WT or *rbohH-3 rbohJ-2* was adhered to the stigma using a micromanipulator and the sample was observed with a confocal microscope (LSM710, Zeiss, Jena, Germany) excited at 488 nm using a Plan-Apo 20 $\times$ /0.8 objective lens. Fluorescence emission of 500–530 nm was captured at 1-min intervals for 20–30 min.
